# Supplementary material for: Improving Repetitive Manufacturing Systems: Model and Insights
Source: Atypon-hosted journal article supplement (doi:10.1287/opre.49.1.99.11194), 2001-02-01
Supplement: opre.49.1.99-sm.pdf [file opre.49.1.99-sm.pdf]

Online Companion for

“Improving Repetitive Manufacturing  
Systems: Model and Insights”

**Operations Research**

Volume 49, Number 1  
January-February 2001

Scott Webster  
Syracuse University

Z. Kevin Weng  
University of Wisconsin-Madison

# Improving Repetitive Manufacturing Systems: Model and Insights

## Appendix

**Proof of Lemma 3.1.** From (3.2) it follows that

$$C_i^2 = (1-i/n)^2 \sum_{j=0}^n (1 + (m+n-j)) d^2 + \sum_{j=0}^{m+i} (1 + (m+i-j)) d^2. \quad (A.1)$$

Substituting the following identity for a quadratic series

$$\sum_{j=0}^k [1 + (i+k-j)] d^2 = i d^2 + [i^3 - 2/3 + i^2(-2/2) - i(-2/6) + i^2 k^2 + i(2k^2 + 2k - 2k)] d^2 \quad (A.2)$$

into (A.1) and letting  $x = i/n$ , and  $y = m/n$  we get

$$C_i^2 = [(n^3 - 2/3)H_3(x,y) + n^2(-2/2)H_2(x,y) + n(1 - 2/6)H_1(x,y)] d^2 \quad (A.3)$$

where

$$H_k(x,y) = (1+y)^k - [(1+y)^k - y^k](x-x^2) - (x-x^k) \text{ for } k \in \{1,2,3\}. \quad (A.4)$$

If  $x = 0$ , then

$$C_0^2 = [1 - (x-x^2)/(1+y)]^{1/2} [\min_{x \in [0,1]} \{1 - (x-x^2)/(1+y)\}]^{1/2} = \{1 - 1/[4(1+y)]\}^{1/2} (3/4)^{1/2} \approx .866.$$

If  $x > 0$ , it follows from  $1 - (x-x^2)/(1+y) > H_k(x,y)/H_k(1,y) = 1 - (x-x^2) - (x-x^3)$  for  $k \in \{1,2,3\}$  that

$$C_i^2 > [1 - (x-x^2)/(1+y)]^{1/2} [1 - (x-x^2) - (x-x^3)]^{1/2} [\min_{x \in [0,1]} \{1 - (x-x^2) - (x-x^3)\}]^{1/2} \approx .607. \quad \square$$

**Proof of Theorem 3.1.** If we let  $z = I_T / C_n$  and  $\alpha_i = C_i / C_n$ , then  $EBH(n, I_T)$  can be written as

$$EBH(n, I_T) = I_T C_h + c_n (C_h + C_b) (1/n) \int_{I_T}^{\infty} G(z/i) i \cdot \quad (A.5)$$

From Lemma 3.1, it follows that for any given  $n$  and  $I_T$ , there exists  $z \in [0, 1]$  (or  $z \in [0, 1]$  if  $\beta = 0$ ) such that

$$EBH(n, I_T) = I_T C_h + c_n (C_h + C_b) G(z/ \cdot) \cdot \quad (A.6)$$

Thus, if  $I_T^*$  is the optimal target buffer stock for given  $n$ , then expected backorder and holding cost can be expressed as

$$EBH(n, I_T^*) = [(z/ \cdot) C_h + (C_h + C_b) G(z/ \cdot)] c_n, \quad (A.7)$$

which can be interpreted as the expected backorder and holding cost in a single period with the standard deviation in period-ending inventory equal to  $c_n$ . Let  $F(x)$  denote the cumulative standard normal probability distribution function. From standard newsvendor analysis, it follows that

$$F^{-1}(C_b/(C_h + C_b)) = \operatorname{argmin}_z \{ [(z/ \cdot) C_h + (C_h + C_b) G(z/ \cdot)] c_n \}, \quad (A.8)$$

which in turn implies  $I_T^* = [0.607 z_{SL} c_n, z_{SL} c_n]$  (or  $I_T^* = [0.866 z_{SL} c_n, z_{SL} c_n]$  if  $\beta = 0$ ).

Let  $n^*$  denote the optimal cycle length for a given target buffer stock  $I_T$ . From (A.6), the minimum expected cost per period can be expressed as

$$EC_1(n^*, I_T) = S_o G(0) / n^* + [z C_h + (C_h + C_b) G(z/ \cdot)] c_n \quad (A.9)$$

for some  $z \in [0, 1]$  (or  $z \in [0, 1]$  if  $\beta = 0$ ). Letting  $r = m/n^*$ ,  $c_n$  and  $S_o$  can be written as

$$c_n = \{ (2/3)[n^*(1+r)]^3 + (1 - 2/2)[n^*(1+r)]^2 + (1 - 2/6)[n^*(1+r)] \}^{1/2} d \quad (A.10)$$

$$= \{ (8/3 + 4/2 r + 2/2 r^2) n^* + (4/2 + 2/2 r - 2/2) + (2 - 2/2 + 2/3)/n^* \}^{1/2} d. \quad (A.11)$$

The coefficients on  $(n^*)^k$  for  $k \in \{1, 2, 3\}$  in (A.10) are all nonnegative and sum to  $U^2 = (2/3)(1+r)^3 + (1 - 2/2)(1+r)^2 + (1 - 2/6)(1+r)$ ; the coefficients on  $(n^*)^k$  for  $k \in \{-1, 0, 1\}$

are all nonnegative and sum to  $V^2 = \frac{1}{2}(1+4r+2r^2) + (2+2r) + 2$ . Therefore, there exists

$[1/2, 3/2]$  and  $(1/2, 3/2]$  such that

$$EC_1(n^*, I_T) = S_o G(0) V_d(n^*)^{-1} + [zC_h + (C_h + C_b)G(z/)] U_d(n^*). \quad (A.12)$$

A function of the form  $f(n) = An^a + Bn^b$  with  $A > 0$ ,  $B > 0$ ,  $a < 0$ , and  $b > 0$ , is minimized at

$n^* = [(-aA)/(bB)]^{1/(b-a)}$  and the ratio of  $A(n^*)^a$  to  $B(n^*)^b$  is  $-b/a$  (Duffin, Peterson, and

Zener 1967). Therefore,  $n^*$  is the optimal value of  $n$  and  $EC_1(n^*, I_T)$  is the optimum for the following alternative problem

$$\text{Min}_n \{ [S_o G(0) V_d] n^{-1} + [zC_h + (C_h + C_b)G(z/)] U_d n \} \quad (A.13)$$

for which

$$\{ S_o G(0) V_d(n^*)^{-1} \} / \{ [zC_h + (C_h + C_b)G(z/)] U_d(n^*) \} = EPC_1(n^*) / EBH(n^*, I_T) = \frac{1}{3} \quad (A.14)$$

When  $r = 0$ , it follows from (A.10) and (A.11) that  $U = (1+r)^{1/2}$ ,  $V = 2^{1/2}$ ,  $\alpha = 1/2$ , and  $\beta = 3/2$ .  $\square$
